# Supplementary material for: Introducing competitive adsorption species in sulfonimide salt-based electrolytes for inhibiting aluminium corrosion
Source: Royal Society of Chemistry journal article supplement (doi:10.1039/d2cc03434d), 2022-01-01
Supplement: d2cc03434d1.pdf [file d2cc03434d1.pdf]

1

## Supplementary Information

### 2 **Introducing competitive adsorption species in sulfonimide salt-based electrolytes for** 3 **inhibiting aluminium corrosion**

4 Weiran Xue <sup>a,b,#</sup>, Qiuchen Wang <sup>a,b,#</sup>, Guochen Sun <sup>b</sup>, Quan Li <sup>a</sup>, Xiqian Yu <sup>a,b,\*</sup> and Hong Li <sup>a,b,\*</sup>

5

6

7 <sup>a</sup>Beijing Advanced Innovation Center for Materials Genome Engineering, Institute of Physics, Chinese  
8 Academy of Sciences, Beijing, 100190, China

9 <sup>b</sup>Center of Materials Science and Optoelectronics Engineering, University of Chinese Academy of  
10 Sciences, Beijing, 100049, China

11

12

13 **E-mail:** xyu@iphy.ac.cn, hli@iphy.ac.cn

14

15

16 <sup>#</sup>These authors contributed equally to this work.

17

## 1 Experimental Section

### 2 1. Materials and Electrode Preparation

3 Ethylene carbonate (EC), diethyl carbonate (DEC) and lithium bis(trifluoromethanesulfonyl)imide  
4 (LiTFSI) were purchased from Dodo Chem Co., Ltd. 1-ethyl-3-methylimidazolium nitrate  
5 ([EMIM]NO<sub>3</sub>) was purchased from Adamas Reagent Co., Ltd. The no-additive electrolyte (1 M LiTFSI  
6 in EC:DEC 1:1 in vol.) served as the baseline electrolyte to which various concentrations of [EMIM]NO<sub>3</sub>  
7 additive were added. The LiCoO<sub>2</sub> was purchased from Ningbo Shanshan Co., Ltd. In this study, a  
8 cathode slurry comprising of LiCoO<sub>2</sub> powders, PVdF binder and conductive carbon black with a weight  
9 ratio of 90:5:5 was cast on an aluminum foil with a blade and dried in a vacuum oven at 120 °C for 8  
10 hours. Afterwards, the obtained cathodes were punched into small disks (Φ12 mm, with a mass loading  
11 of ~ 4.6 mg cm<sup>-2</sup>). The lithium foils with a thickness of 200 μm were purchased from China Energy  
12 Lithium Co., Ltd.

### 13 2. Electrochemical Tests

14 The LiCoO<sub>2</sub> || Li coin cells containing 100 μL of different electrolytes were assembled in an argon-  
15 filled glovebox (H<sub>2</sub>O < 0.1 ppm, O<sub>2</sub> < 0.1 ppm). These assembled coin cells were then kept at 25 °C for  
16 8 hours to ensure adequate electrolyte infiltration before further tests. The electrochemical performance  
17 of these cells was evaluated on Landt Battery Test System (Wuhan LAND Electronic Co., Ltd). Cycling  
18 tests were conducted in the voltage range of 3 - 4.2 V and the cells were charged and discharged at 0.1C  
19 in the first cycle and then cycled at 0.5C. A high-low temperature chamber (Guangzhou GWS Co., Ltd)  
20 was used to provide constant testing temperatures. Electrochemical impedance spectroscopy (EIS) tests  
21 were conducted in the charged state (4.2 V) by using an electrochemical workstation (Autolab, Metrohm)  
22 in a frequency range of 200 kHz to 20 mHz. Homemade three-electrode coin cells were prepared for the  
23 cyclic voltammetry (CV) measurements with details shown in Figure S4. The CV tests were carried out  
24 at a scanning rate of 10 mV s<sup>-1</sup> in a potential range from 2.0 to 4.5 V vs. Li<sup>+</sup>/Li (calibrated).

### 25 3. Characterizations

26 After the cycling tests, LiCoO<sub>2</sub> || Li cells were disassembled in a glove box to obtain LiCoO<sub>2</sub> cath-  
27 odes in the charged state (4.2 V). The LiCoO<sub>2</sub> cathodes were then washed three times utilizing dimethyl  
28 carbonate (DMC) to remove residual electrolytes and dried in a vacuum chamber. The surface morphol-  
29 ogy of cycled cathodes were characterized using scanning electron microscopy (SEM, S-8100, Hitachi).

1 The aluminum electrodes in the three-electrode coin cells were obtained with the same method after the  
2 CV tests and their surface morphologies were also characterized by SEM. The Raman spectra of pristine  
3 aluminium foil and aluminium foils after immersion in the no-additive electrolyte and the 0.1 M additive  
4 electrolyte were obtained using a HORIBA LabRAM HR Evolution system equipped with a frequency-  
5 doubled Nd:YAG laser (532 nm green).

#### 6 4. Theoretical Calculations

7 The adsorption configurations of various adsorbates on the (110) facet of  $\text{Al}_2\text{O}_3$  were optimized by  
8 density functional theory (DFT) method carried out in the Vienna Ab initio Simulation Package (VASP)  
9 code. The generalized gradient approximation (GGA) of PBE exchange-correlation functional was used.  
10 The plane-wave cutoff energy was set as 400 eV. The threshold values of energy convergence and force  
11 were set as  $10^{-5}$  eV and  $0.03 \text{ eV \AA}^{-1}$ , respectively. To eliminate the interaction between adjacent images,  
12 a vacuum space larger than  $15 \text{ \AA}$  was constructed along the vertical direction. In the general models, the  
13 k-point mesh was sampled with a separation of  $0.03 \text{ \AA}^{-1}$ . The  $2 \times 1$  size (110) plane of  $\alpha\text{-Al}_2\text{O}_3$  retained a  
14 thickness of 5 molecular layers and the bottom two layers were fixed to simulate the adsorption surface.  
15 In addition, the adsorption energy of different adsorbates is obtained by the following formula,

$$16 E_{ads} = E_T - E_s - E_a$$

17 where  $E_T$ ,  $E_s$  and  $E_a$  are the energy of the total adsorption system, the  $\text{Al}_2\text{O}_3$  substrate and the adsorbates  
18 respectively. Besides, the DFT calculation results are presented in Table S2 and a list of atomic coordin-  
19 ates of the optimized geometries (adsorbates and three layers of the  $\text{Al}_2\text{O}_3$  substrate) are presented at the  
20 end of the supplementary information.

21

## 1 Supplementary Figures

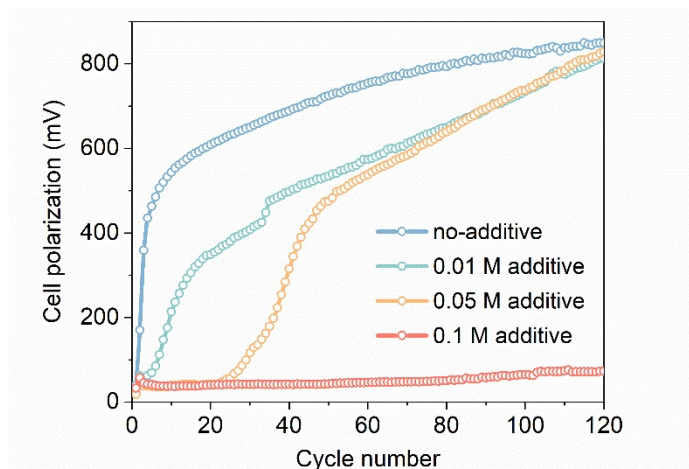

2

3 **Figure S1.** The polarizations of  $\text{LiCoO}_2 \parallel \text{Li}$  cells using different electrolytes. The cell polarization was  
4 determined by subtracting the mid-voltage of discharge process from the mid-voltage of charge process  
5 at each charge-discharge cycle.

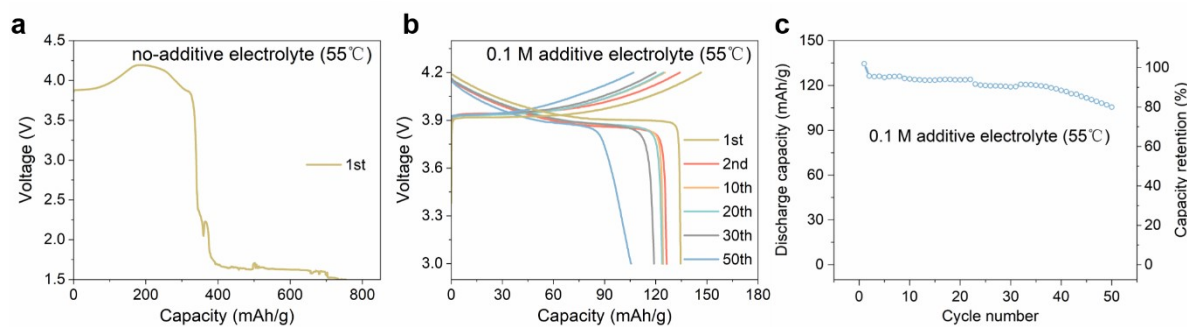

6

7 **Figure S2.** The charge-discharge curves of  $\text{LiCoO}_2 \parallel \text{Li}$  cells using (a) no-additive electrolyte and (b)  
8 0.1 M additive electrolyte at the elevated temperature of 55 °C. (c) The discharge capacity and capacity  
9 retention of  $\text{LiCoO}_2 \parallel \text{Li}$  cell with the 0.1 M additive electrolyte at 55 °C.

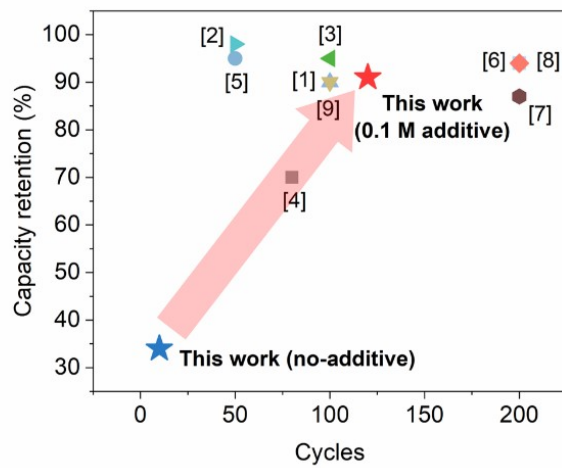

1

2 **Figure S3.** Summary of the cycling stability of 4 V-class cathodes (with aluminium current collector) in

3 LiTFSI-based electrolytes achieved by various approaches.

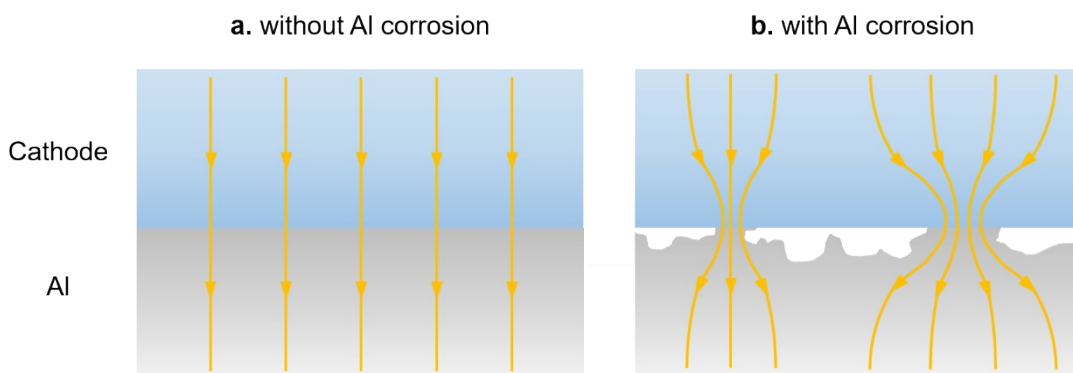

4

5 **Figure S4.** Schematic illustrations of electron transfer process at the cathode/aluminum current collector

6 interface (a) without and (b) with aluminum corrosion.

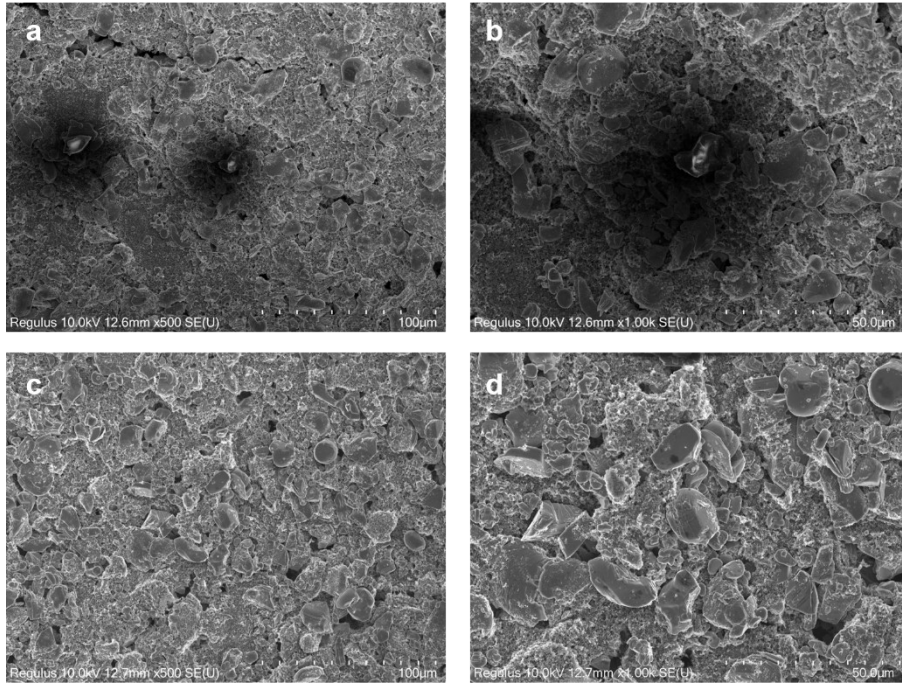

1  
 2 **Figure S5.** SEM images of disassembled LiCoO<sub>2</sub> cathodes in the (a, b) no-additive electrolyte and (c, d)  
 3 0.1 M additive electrolyte after 20 charge-discharge cycles.

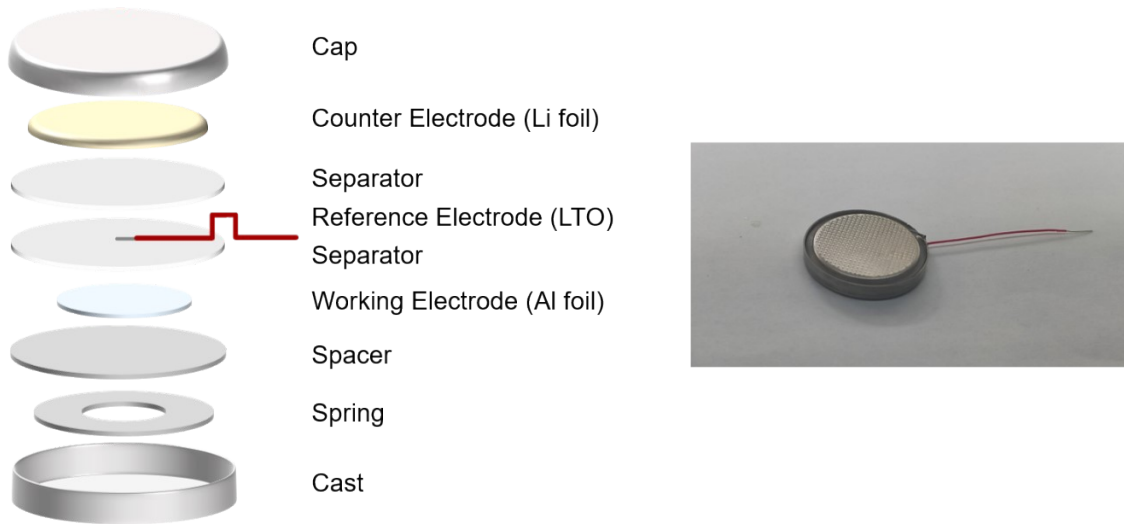

4  
 5 **Figure S6.** The inner structure and image of the homemade three-electrode coin cell. The Li<sub>4</sub>Ti<sub>5</sub>O<sub>12</sub> was  
 6 casted on an enameled copper wire and served as the reference electrode (LTO). The aluminum foil was  
 7 used as the working electrode and the lithium foil was used as the counter electrode.

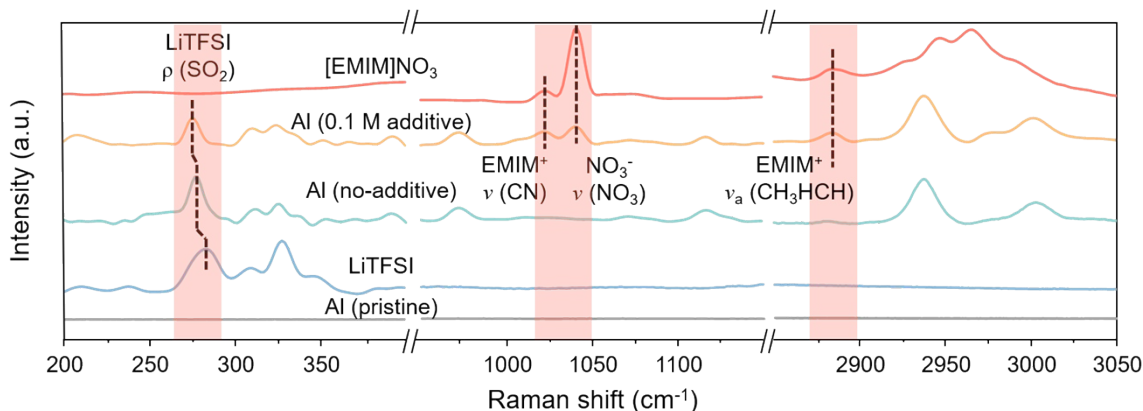

1

2 **Figure S7.** Raman spectra of pure [EMIM]NO<sub>3</sub>, pure LiTFSI, pristine aluminium foil and aluminium  
 3 foils after immersion in the no-additive electrolyte and 0.1 M additive electrolyte (vibrational modes:  $\nu$   
 4 = stretching;  $\rho$  = rocking;  $\nu_a$  = asymmetric stretching).

5 **Table S1.** Summary of the cycling stability of 4 V-class cathodes (with aluminium current collector)  
 6 achieved in LiTFSI-based electrolytes by different methods

| Ref.      | Method                                                      | Electrolyte                                                           | Cell configuration | Voltage range | C-rate | Capacity retention (cycles) |
|-----------|-------------------------------------------------------------|-----------------------------------------------------------------------|--------------------|---------------|--------|-----------------------------|
| [1]       | Chromate conversion coating                                 | 1M LiTFSI EC/EMC 3:7 vol.                                             | NMC333    Li       | 2.7 ~ 4.2 V   | 1C     | 90% (100)                   |
| [2]       | Concentrated electrolytes                                   | 2.3M LiTFSI EC:DME 1:2 vol.                                           | NMC622    Graphite | 2.8 ~ 4.2 V   | 0.5C   | 98.7% (50)                  |
| [3]       | Concentrated electrolytes                                   | 3.5M LiTFSI DMC/C <sub>2</sub> [FSI] 1:1 vol.                         | NMC523    Li       | 2.8 ~ 4.5 V   | C/6    | 95% (100)                   |
| [4]       | Concentrated electrolytes                                   | 5M LiTFSI in EC:DEC 3:7 vol.                                          | NMC811    Li       | 3.0 ~ 4.6 V   | 1C     | 70% (80)                    |
| [5]       | Low solubility solvents                                     | 1M LiTFSI in F-C4                                                     | NMC111    Li       | 3.0 ~ 4.3 V   | 0.2C   | 95% (50)                    |
| [6]       | Low solubility solvents                                     | 1M LiTFSI in MCP                                                      | NMC111    Graphite | 2.8 ~ 4.2 V   | 1C     | 94.4% (200)                 |
| [7]       | Partially hydrogenated anion                                | 1M LiDFTFSI in EC:EMC 3:7 vol.                                        | NMC111    Li       | 2.7 ~ 4.2 V   | 0.2C   | 87% (200)                   |
| [8]       | Adding LiBOB                                                | 0.75M LiTFSI + 0.25M LiBOB in FEC/1,2-BC 1:1 mol.                     | NMC111    Graphite | 3.0 ~ 4.2 V   | 0.2C   | 94.5% (200)                 |
| [9]       | Adding LiDFOB and LiPF <sub>6</sub>                         | 0.8M LiTFSI + 0.2M LiDFOB + 0.01M LiPF <sub>6</sub> in EC:PC 1:1 vol. | LCO    Li          | 3.0 ~ 4.2 V   | 0.5C   | 90% (100)                   |
| This work | Adding competitive adsorption species [EMIM]NO <sub>3</sub> | 1M LiTFSI in EC:DEC 1:1 vol.                                          | LCO    Li          | 3.0 ~ 4.2 V   | 0.5C   | 90.2% (120)                 |

7

8

1 **Table S2.** The calculated energies of the total adsorption system, the Al<sub>2</sub>O<sub>3</sub> substrate and the adsorbates  
2 used for deducing the values of the adsorption energy of different adsorbates

| Adsorbates                   | Energy (eV) |           |           |        |
|------------------------------|-------------|-----------|-----------|--------|
|                              | Adsorbates  | Substrate | Total     | Ads    |
| NO <sub>3</sub> <sup>-</sup> | -28.071     | -933.375  | -966.007  | -4.561 |
| EMIM <sup>+</sup>            | -106.786    | -933.375  | -1045.27  | -5.109 |
| TFSI <sup>-</sup>            | -86.992     | -933.375  | -1022.551 | -2.184 |

3

#### 4 **Reference:**

5 [1] Piao N, Wang L, Anwar T, Feng X, Tian G, Wang J, Tang Y, He X, *Corros. Sci.*, 2019, **158**, 108100.

6 [2] Liang H, Zuo X, Zhang L, Huang W, Chen Q, Zhu T, Liu J, Nan J, *J. Electrochem. Soc.*, 2020, **167**,  
7 090520.

8 [3] Wang Z, Sun Y, Mao Y, Zhang F, Zheng L, Fu D, Shen Y, Hu J, Dong H, Xu J, Wu X, *Energy*  
9 *Storage Mater.*, 2020, **30**, 228-237.

10 [4] Qian K, Liu Y, Zhou X, Gosztola DJ, Nguyen H, Li T, *Energy Storage Mater.*, 2021, **41**, 222-229.

11 [5] Bolloli M, Kalhoff J, Alloin F, Bresser D, Phung Le ML, Langlois B, Passerini S, Sanchez JY, *J.*  
12 *Phys. Chem. C.*, 2015, **119**, 22404-22414.

13 [6] Brox S, Röser S, Streipert B, Hildebrand S, Rodehorst U, Qi X, Wagner R, Winter M,  
14 Cekic-Laskovic, *ChemElectroChem.*, 2017, **4**, 304-309.

15 [7] Qiao L, Oteo U, Martinez-Ibañez M, Santiago A, Cid R, Sanchez-Diez E, Lobato E, Meabe L,  
16 Armand M, Zhang H, *Nat. Mater.*, 2022, **21**, 455-462.

17 [8] Wang Z, Hofmann A, Hanemann T, *Electrochim. Acta*, 2019, **298**, 960-972.

18 [9] Geng Z, Lu J, Li Q, Qiu J, Wang Y, Peng J, Huang J, Li W, Yu X, Li H, *Energy Storage Mater.*,  
19 2019, **23**, 646-652.

20

21

#### 22 **Cartesian coordinates of the optimized adsorption geometries**

23 Al<sub>2</sub>O<sub>3</sub>-NO<sub>3</sub><sup>-</sup>

24 N O Al

25 1 39 48



|    |              |              |             |
|----|--------------|--------------|-------------|
| 1  | Cartesian    |              |             |
| 2  | 9.863546584  | 6.924930020  | 7.339530140 |
| 3  | 3.232665593  | 5.419654616  | 3.229200169 |
| 4  | 9.840045775  | 6.981263906  | 4.180249989 |
| 5  | 3.264913933  | 2.873692575  | 3.269220024 |
| 6  | 9.735989778  | 1.277288833  | 4.251780137 |
| 7  | 3.315962958  | 16.567142818 | 3.444249868 |
| 8  | 9.821506759  | 4.123311587  | 4.164839968 |
| 9  | 7.609167018  | 2.647197122  | 3.244609848 |
| 10 | 1.126471701  | 4.225872491  | 4.252929986 |
| 11 | 7.635148722  | 0.081187121  | 3.246219978 |
| 12 | 1.009881556  | 6.764875320  | 4.280990049 |
| 13 | 7.606816859  | 5.462733237  | 3.435739964 |
| 14 | 1.105843222  | 1.350522885  | 3.981760159 |
| 15 | 11.956292821 | 8.149364079  | 3.240010113 |
| 16 | 5.557808475  | 1.465179020  | 4.238670155 |
| 17 | 11.979009984 | 5.591970089  | 3.238859922 |
| 18 | 5.364710257  | 4.072942422  | 4.280990049 |
| 19 | 11.910597022 | 2.720431174  | 3.388130084 |
| 20 | 5.396828055  | 6.888313118  | 4.078130111 |
| 21 | 3.242457467  | 13.699912208 | 3.240240082 |
| 22 | 9.861065688  | 15.271794773 | 4.240969852 |
| 23 | 3.260083073  | 11.135724673 | 3.262319908 |
| 24 | 9.796569397  | 9.518444161  | 4.274319902 |
| 25 | 3.306040153  | 8.283902741  | 3.387670144 |
| 26 | 9.759882020  | 12.424280160 | 4.122980013 |
| 27 | 7.631492747  | 10.904424162 | 3.280489907 |
| 28 | 1.138483190  | 12.514580291 | 4.231770039 |
| 29 | 7.627184641  | 8.359456859  | 3.285779893 |
| 30 | 1.063541728  | 15.076944758 | 4.275240123 |
| 31 | 7.615303889  | 13.786567190 | 3.458280072 |
| 32 | 0.994475468  | 9.670379987  | 4.048459917 |
| 33 | 11.963996206 | 16.433929485 | 3.253120095 |
| 34 | 5.465502492  | 9.738975141  | 4.238900125 |
| 35 | 11.973396062 | 13.892607330 | 3.257489860 |
| 36 | 5.341992706  | 12.327352397 | 4.216819957 |
| 37 | 11.938667410 | 11.045922282 | 3.462189898 |
| 38 | 5.462238728  | 15.163765653 | 4.154949903 |
| 39 | 9.784296433  | 8.069171310  | 6.469440252 |
| 40 | 7.615956019  | 6.599850143  | 5.648570031 |
| 41 | 10.007163067 | 5.810015337  | 6.638259888 |
| 42 | 4.597017706  | 4.121323347  | 2.551390074 |
| 43 | 4.515939567  | 0.128242508  | 4.895320132 |

|    |              |              |             |
|----|--------------|--------------|-------------|
| 1  | 8.459504221  | 4.121323347  | 2.551390074 |
| 2  | 8.293040616  | 0.248697691  | 5.058620155 |
| 3  | 1.931504538  | 4.121323347  | 2.551390074 |
| 4  | 1.797941792  | 0.028166960  | 5.148089990 |
| 5  | 11.125017584 | 4.121323347  | 2.551390074 |
| 6  | 11.205050602 | 16.456628952 | 5.014690131 |
| 7  | 8.948451615  | 1.359967088  | 2.551390074 |
| 8  | 9.078620054  | 5.571259109  | 5.047349930 |
| 9  | 12.812113988 | 1.359967088  | 2.551390074 |
| 10 | 12.758584066 | 5.323555430  | 4.930279970 |
| 11 | 6.284113721  | 1.359967088  | 2.551390074 |
| 12 | 6.368977794  | 5.535138958  | 4.862659991 |
| 13 | 2.420451737  | 1.359967088  | 2.551390074 |
| 14 | 2.496568278  | 5.676470671  | 4.950520039 |
| 15 | 0.244408304  | 6.882845396  | 2.551390074 |
| 16 | 0.753461738  | 2.634273437  | 5.343129933 |
| 17 | 4.108070312  | 6.882845396  | 2.551390074 |
| 18 | 3.776186666  | 3.011876385  | 5.145330012 |
| 19 | 10.636070190 | 6.882845396  | 2.551390074 |
| 20 | 10.856455150 | 2.645374548  | 4.885200098 |
| 21 | 6.772407817  | 6.882845396  | 2.551390074 |
| 22 | 6.756349697  | 2.769972008  | 4.955350086 |
| 23 | 4.597017706  | 12.405723580 | 2.551390074 |
| 24 | 4.343861651  | 8.335928814  | 4.878989890 |
| 25 | 8.459504221  | 12.405723580 | 2.551390074 |
| 26 | 8.334819745  | 8.240658206  | 5.120029926 |
| 27 | 1.931504538  | 12.405723580 | 2.551390074 |
| 28 | 0.750850542  | 8.314389750  | 5.357390106 |
| 29 | 11.125017584 | 12.405723580 | 2.551390074 |
| 30 | 11.070443320 | 8.186478227  | 5.014920101 |
| 31 | 8.948451615  | 9.644367197  | 2.551390074 |
| 32 | 8.910589158  | 13.908016501 | 4.939250156 |
| 33 | 12.812113988 | 9.644367197  | 2.551390074 |
| 34 | 12.665886650 | 13.996493563 | 5.064370081 |
| 35 | 6.284113721  | 9.644367197  | 2.551390074 |
| 36 | 6.313098103  | 13.650537287 | 4.911420062 |
| 37 | 2.420451737  | 9.644367197  | 2.551390074 |
| 38 | 2.464842109  | 13.711510318 | 4.986170128 |
| 39 | 0.244408304  | 15.167244888 | 2.551390074 |
| 40 | 0.211768311  | 11.130754196 | 4.965470120 |
| 41 | 4.108070312  | 15.167244888 | 2.551390074 |
| 42 | 4.095405914  | 11.122304484 | 4.998359889 |
| 43 | 10.636070190 | 15.167244888 | 2.551390074 |

|    |                                                   |              |             |    |    |
|----|---------------------------------------------------|--------------|-------------|----|----|
| 1  | 10.655785064                                      | 11.000026596 | 4.950979978 |    |    |
| 2  | 6.772407817                                       | 15.167244888 | 2.551390074 |    |    |
| 3  | 6.981826408                                       | 10.591274220 | 5.103929996 |    |    |
| 4  |                                                   |              |             |    |    |
| 5  | Al <sub>2</sub> O <sub>3</sub> -EMIM <sup>+</sup> |              |             |    |    |
| 6  | H                                                 | C            | N           | O  | Al |
| 7  | 11                                                | 6            | 2           | 36 | 48 |
| 8  | Cartesian                                         |              |             |    |    |
| 9  | 4.618820875                                       | 6.996507164  | 7.309800088 |    |    |
| 10 | 8.641113120                                       | 6.977784177  | 6.957900077 |    |    |
| 11 | 7.958284641                                       | 9.369324906  | 7.831200063 |    |    |
| 12 | 4.525470550                                       | 8.791239540  | 8.983500302 |    |    |
| 13 | 4.582133497                                       | 9.989329971  | 7.672500014 |    |    |
| 14 | 5.279062928                                       | 10.961917958 | 9.888600111 |    |    |
| 15 | 6.591451827                                       | 11.086183839 | 8.703000247 |    |    |
| 16 | 6.644590315                                       | 9.835074326  | 9.989400208 |    |    |
| 17 | 7.583708263                                       | 4.994001827  | 7.599000335 |    |    |
| 18 | 5.806394949                                       | 4.995658982  | 7.782600224 |    |    |
| 19 | 6.789119624                                       | 6.227217919  | 8.653799593 |    |    |
| 20 | 5.419675955                                       | 7.511299679  | 6.760199815 |    |    |
| 21 | 7.770800346                                       | 7.505831957  | 6.505499929 |    |    |
| 22 | 7.323371384                                       | 8.617929576  | 7.366199791 |    |    |
| 23 | 5.207124338                                       | 9.432783669  | 8.402100205 |    |    |
| 24 | 5.991137263                                       | 10.377370873 | 9.290400445 |    |    |
| 25 | 6.700469617                                       | 5.633226137  | 7.732799649 |    |    |
| 26 | 6.041402643                                       | 8.525973278  | 7.608900368 |    |    |
| 27 | 6.571345519                                       | 6.539871109  | 6.537600160 |    |    |
| 28 | 3.236712807                                       | 5.402422871  | 3.247200027 |    |    |
| 29 | 9.873600127                                       | 6.873401193  | 4.298399985 |    |    |
| 30 | 3.263477768                                       | 2.843371726  | 3.253800049 |    |    |
| 31 | 9.748523438                                       | 1.258731759  | 4.219200164 |    |    |
| 32 | 3.272616928                                       | 16.550077479 | 3.460500017 |    |    |
| 33 | 9.897100935                                       | 4.069959938  | 4.009500146 |    |    |
| 34 | 7.618176219                                       | 2.630296956  | 3.264599964 |    |    |
| 35 | 1.128691219                                       | 4.241447081  | 4.258499891 |    |    |
| 36 | 7.622353587                                       | 0.075553725  | 3.245999962 |    |    |
| 37 | 0.998261694                                       | 6.822534535  | 4.253400117 |    |    |
| 38 | 7.563079784                                       | 5.507966259  | 3.484200016 |    |    |
| 39 | 1.124252182                                       | 1.340747349  | 4.133999795 |    |    |
| 40 | 11.938536673                                      | 8.177696688  | 3.248400092 |    |    |
| 41 | 5.506237278                                       | 1.481250732  | 4.258199930 |    |    |
| 42 | 11.997549779                                      | 5.611355247  | 3.228300065 |    |    |
| 43 | 5.326195282                                       | 4.052728440  | 4.235399812 |    |    |

|    |              |              |             |
|----|--------------|--------------|-------------|
| 1  | 12.015305928 | 2.726396141  | 3.468900025 |
| 2  | 5.423070455  | 6.860145928  | 4.042800218 |
| 3  | 3.265044281  | 13.679366647 | 3.256499916 |
| 4  | 9.807536545  | 15.277758753 | 4.284300059 |
| 5  | 3.277317245  | 11.130091532 | 3.262799978 |
| 6  | 9.684157107  | 9.494419365  | 4.353599846 |
| 7  | 3.277969764  | 8.267831400  | 3.468900025 |
| 8  | 9.741081529  | 12.410859970 | 4.003200084 |
| 9  | 7.605381083  | 10.898459194 | 3.247499987 |
| 10 | 1.113415674  | 12.498840281 | 4.241699874 |
| 11 | 7.651076883  | 8.325325195  | 3.252899945 |
| 12 | 1.045524494  | 15.048115397 | 4.232700169 |
| 13 | 7.586580592  | 13.786401277 | 3.471900076 |
| 14 | 1.076206029  | 9.651325668  | 4.102499932 |
| 15 | 11.968957219 | 16.436083391 | 3.261299953 |
| 16 | 5.583006533  | 9.669717323  | 4.287300110 |
| 17 | 11.959034414 | 13.901720695 | 3.257400021 |
| 18 | 5.413800947  | 12.284274270 | 4.244100004 |
| 19 | 12.005644597 | 11.032667018 | 3.389699981 |
| 20 | 5.421112119  | 15.180996904 | 4.131900072 |
| 21 | 4.597017706  | 4.121323347  | 2.551200092 |
| 22 | 4.567380415  | 0.079364554  | 4.947000146 |
| 23 | 8.459504221  | 4.121323347  | 2.551200092 |
| 24 | 8.427647898  | 0.105377568  | 4.993199855 |
| 25 | 1.931504538  | 4.121323347  | 2.551200092 |
| 26 | 1.978897977  | 16.432604156 | 4.943700135 |
| 27 | 11.125017584 | 4.121323347  | 2.551200092 |
| 28 | 11.310673891 | 16.319936384 | 5.082000196 |
| 29 | 8.948451615  | 1.359967088  | 2.551200092 |
| 30 | 10.133414056 | 5.290749096  | 5.424000174 |
| 31 | 12.812113988 | 1.359967088  | 2.551200092 |
| 32 | 12.823994740 | 5.578218074  | 4.968599975 |
| 33 | 6.284113721  | 1.359967088  | 2.551200092 |
| 34 | 6.346260242  | 5.402754203  | 4.817099869 |
| 35 | 2.420451737  | 1.359967088  | 2.551200092 |
| 36 | 2.637703671  | 5.329023153  | 5.072700083 |
| 37 | 0.244408304  | 6.882845396  | 2.551200092 |
| 38 | 0.234224632  | 2.777427971  | 4.960500151 |
| 39 | 4.108070312  | 6.882845396  | 2.551200092 |
| 40 | 4.042790375  | 2.869881761  | 5.028300136 |
| 41 | 10.636070190 | 6.882845396  | 2.551200092 |
| 42 | 10.678371489 | 2.622012663  | 4.968300015 |
| 43 | 6.772407817  | 6.882845396  | 2.551200092 |

|    |              |              |             |
|----|--------------|--------------|-------------|
| 1  | 6.975298103  | 2.589371994  | 5.090999901 |
| 2  | 4.597017706  | 12.405723580 | 2.551200092 |
| 3  | 4.613990209  | 8.281748835  | 4.994700104 |
| 4  | 8.459504221  | 12.405723580 | 2.551200092 |
| 5  | 8.613826377  | 8.055750626  | 4.741200060 |
| 6  | 1.931504538  | 12.405723580 | 2.551200092 |
| 7  | 1.972369867  | 8.224586865  | 4.941000044 |
| 8  | 11.125017584 | 12.405723580 | 2.551200092 |
| 9  | 11.443453186 | 8.443460196  | 5.063100010 |
| 10 | 8.948451615  | 9.644367197  | 2.551200092 |
| 11 | 8.988924927  | 13.787063942 | 5.050799847 |
| 12 | 12.812113988 | 9.644367197  | 2.551200092 |
| 13 | 12.710276633 | 13.870405602 | 5.025900006 |
| 14 | 6.284113721  | 9.644367197  | 2.551200092 |
| 15 | 6.328895916  | 13.746470559 | 4.950300157 |
| 16 | 2.420451737  | 9.644367197  | 2.551200092 |
| 17 | 2.509232676  | 13.602984446 | 5.037900209 |
| 18 | 0.244408304  | 15.167244888 | 2.551200092 |
| 19 | 0.009530880  | 11.104906332 | 4.884899855 |
| 20 | 4.108070312  | 15.167244888 | 2.551200092 |
| 21 | 3.883246120  | 11.200674679 | 5.091299862 |
| 22 | 10.636070190 | 15.167244888 | 2.551200092 |
| 23 | 9.989798351  | 11.167205679 | 5.423399806 |
| 24 | 6.772407817  | 15.167244888 | 2.551200092 |
| 25 | 6.778152476  | 10.991079144 | 4.988700002 |

26

27 Al<sub>2</sub>O<sub>3</sub>-TFSL-

|    |   |   |    |   |    |   |
|----|---|---|----|---|----|---|
| 28 | C | N | O  | F | Al | S |
| 29 | 2 | 1 | 40 | 6 | 48 | 2 |

30 Cartesian

|    |             |              |             |
|----|-------------|--------------|-------------|
| 31 | 5.888778126 | 10.148390181 | 9.138300419 |
| 32 | 6.875680947 | 6.544013009  | 8.793599904 |
| 33 | 5.271882104 | 8.214810836  | 7.064699829 |
| 34 | 3.245982704 | 5.401428874  | 3.242399991 |
| 35 | 9.801530411 | 6.978116003  | 4.242900163 |
| 36 | 3.292723236 | 2.834921767  | 3.250799999 |
| 37 | 9.762623612 | 1.242328592  | 4.250999987 |
| 38 | 3.266872269 | 16.538147544 | 3.459299952 |
| 39 | 9.753093018 | 4.142034327  | 4.009800106 |
| 40 | 7.617001139 | 2.612568460  | 3.267600015 |
| 41 | 1.143313856 | 4.208475327  | 4.228499830 |
| 42 | 7.631101313 | 0.067103642  | 3.237899914 |
| 43 | 1.024504290 | 6.790888110  | 4.274999946 |

|    |              |              |              |
|----|--------------|--------------|--------------|
| 1  | 7.583577525  | 5.499350633  | 3.444600105  |
| 2  | 1.119943687  | 1.351682671  | 4.126499891  |
| 3  | 11.964518377 | 8.155329047  | 3.246900067  |
| 4  | 5.503756771  | 1.460042630  | 4.258499891  |
| 5  | 11.964779073 | 5.621296695  | 3.264899924  |
| 6  | 5.353873847  | 4.071451180  | 4.240500033  |
| 7  | 12.030581181 | 2.757876654  | 3.410099968  |
| 8  | 5.440696256  | 6.869258799  | 4.137900174  |
| 9  | 3.237887887  | 13.680195225 | 3.262799978  |
| 10 | 9.854015990  | 15.279912660 | 4.286099821  |
| 11 | 3.272747276  | 11.115345025 | 3.246299922  |
| 12 | 9.823333969  | 9.496573271  | 4.214999825  |
| 13 | 3.235276642  | 8.224752284  | 3.423300013  |
| 14 | 9.854015990  | 12.405557667 | 3.990899920  |
| 15 | 7.670399545  | 10.901773504 | 3.314400092  |
| 16 | 1.129213390  | 12.493041227 | 4.247999936  |
| 17 | 7.606556163  | 8.368072485  | 3.255300075  |
| 18 | 0.959877067  | 15.092189003 | 4.258499891  |
| 19 | 7.569999523  | 13.774140504 | 3.384599984  |
| 20 | 1.081689603  | 9.634260330  | 4.114800096  |
| 21 | 11.947937307 | 16.461765342 | 3.224399909  |
| 22 | 5.353873847  | 9.694404783  | 4.265699834  |
| 23 | 11.977835683 | 13.902880111 | 3.245100081  |
| 24 | 5.347345931  | 12.353200262 | 4.215299785  |
| 25 | 12.002641530 | 11.028359205 | 3.443400040  |
| 26 | 5.448791074  | 15.158298424 | 4.153799862  |
| 27 | 4.827716905  | 10.632199429 | 6.803399920  |
| 28 | 3.400826642  | 9.398486093  | 8.466299772  |
| 29 | 4.202203893  | 6.488839032  | 8.717699647  |
| 30 | 5.464197064  | 5.787316363  | 6.683400124  |
| 31 | 5.737981208  | 11.479858870 | 9.251699746  |
| 32 | 7.155732700  | 9.861417954  | 8.801399767  |
| 33 | 5.580917849  | 9.568647660  | 10.314299762 |
| 34 | 7.919508580  | 7.135188219  | 8.204399943  |
| 35 | 7.099199712  | 5.224473761  | 8.918099999  |
| 36 | 6.687674481  | 7.078025756  | 10.020300150 |
| 37 | 4.597017706  | 4.121323347  | 2.551200092  |
| 38 | 4.572733252  | 0.036451360  | 4.920900017  |
| 39 | 8.459504221  | 4.121323347  | 2.551200092  |
| 40 | 8.427647898  | 16.477506339 | 4.951499999  |
| 41 | 1.931504538  | 4.121323347  | 2.551200092  |
| 42 | 1.952133016  | 16.431278827 | 4.908899814  |
| 43 | 11.125017584 | 4.121323347  | 2.551200092  |

|    |              |              |             |
|----|--------------|--------------|-------------|
| 1  | 11.226723423 | 0.108359951  | 4.953300208 |
| 2  | 8.948451615  | 1.359967088  | 2.551200092 |
| 3  | 8.927300965  | 5.511611407  | 4.979399890 |
| 4  | 12.812113988 | 1.359967088  | 2.551200092 |
| 5  | 12.680117561 | 5.636871285  | 5.053199977 |
| 6  | 6.284113721  | 1.359967088  | 2.551200092 |
| 7  | 6.337251819  | 5.400931629  | 4.956900179 |
| 8  | 2.420451737  | 1.359967088  | 2.551200092 |
| 9  | 2.498526614  | 5.306158266  | 5.023499876 |
| 10 | 0.244408304  | 6.882845396  | 2.551200092 |
| 11 | 0.068805120  | 2.831607950  | 4.889700115 |
| 12 | 4.108070312  | 6.882845396  | 2.551200092 |
| 13 | 4.110681556  | 2.867562188  | 5.008800030 |
| 14 | 10.636070190 | 6.882845396  | 2.551200092 |
| 15 | 10.081712122 | 2.821335170  | 5.379599780 |
| 16 | 6.772407817  | 6.882845396  | 2.551200092 |
| 17 | 7.048412161  | 2.502054594  | 5.133900046 |
| 18 | 4.597017706  | 12.405723580 | 2.551200092 |
| 19 | 4.546099028  | 8.250268322  | 4.941000044 |
| 20 | 8.459504221  | 12.405723580 | 2.551200092 |
| 21 | 8.393571376  | 8.352995140  | 4.988100082 |
| 22 | 1.931504538  | 12.405723580 | 2.551200092 |
| 23 | 1.992084351  | 8.202550062  | 4.906800091 |
| 24 | 11.125017584 | 12.405723580 | 2.551200092 |
| 25 | 11.207531498 | 8.139588544  | 4.999199957 |
| 26 | 8.948451615  | 9.644367197  | 2.551200092 |
| 27 | 9.574747883  | 13.702728779 | 5.350800008 |
| 28 | 12.812113988 | 9.644367197  | 2.551200092 |
| 29 | 12.729730032 | 13.907850588 | 5.012100041 |
| 30 | 6.284113721  | 9.644367197  | 2.551200092 |
| 31 | 6.508285393  | 13.599174372 | 4.849800020 |
| 32 | 2.420451737  | 9.644367197  | 2.551200092 |
| 33 | 2.662771187  | 13.346002971 | 5.087399930 |
| 34 | 0.244408304  | 15.167244888 | 2.551200092 |
| 35 | 0.135782398  | 11.083864019 | 4.904999882 |
| 36 | 4.108070312  | 15.167244888 | 2.551200092 |
| 37 | 4.265656231  | 11.071603246 | 4.898999780 |
| 38 | 10.636070190 | 15.167244888 | 2.551200092 |
| 39 | 10.523266466 | 11.007481818 | 5.127300024 |
| 40 | 6.772407817  | 15.167244888 | 2.551200092 |
| 41 | 7.694031091  | 11.096622532 | 5.351399928 |
| 42 | 4.656552983  | 9.557546302  | 7.800900042 |
| 43 | 5.256998284  | 6.740353279  | 7.785900235 |
